# Supplementary material for: Functional architecture of pancreatic islets identifies a population of first responder cells that drive the first-phase calcium response
Source: PubMed Central journal article supplement (PMC9506623; doi:10.1371/journal.pbio.3001761), 2022-09-13
Supplement: pbio.3001761.s001.pdf [file pbio.3001761.s001.pdf]

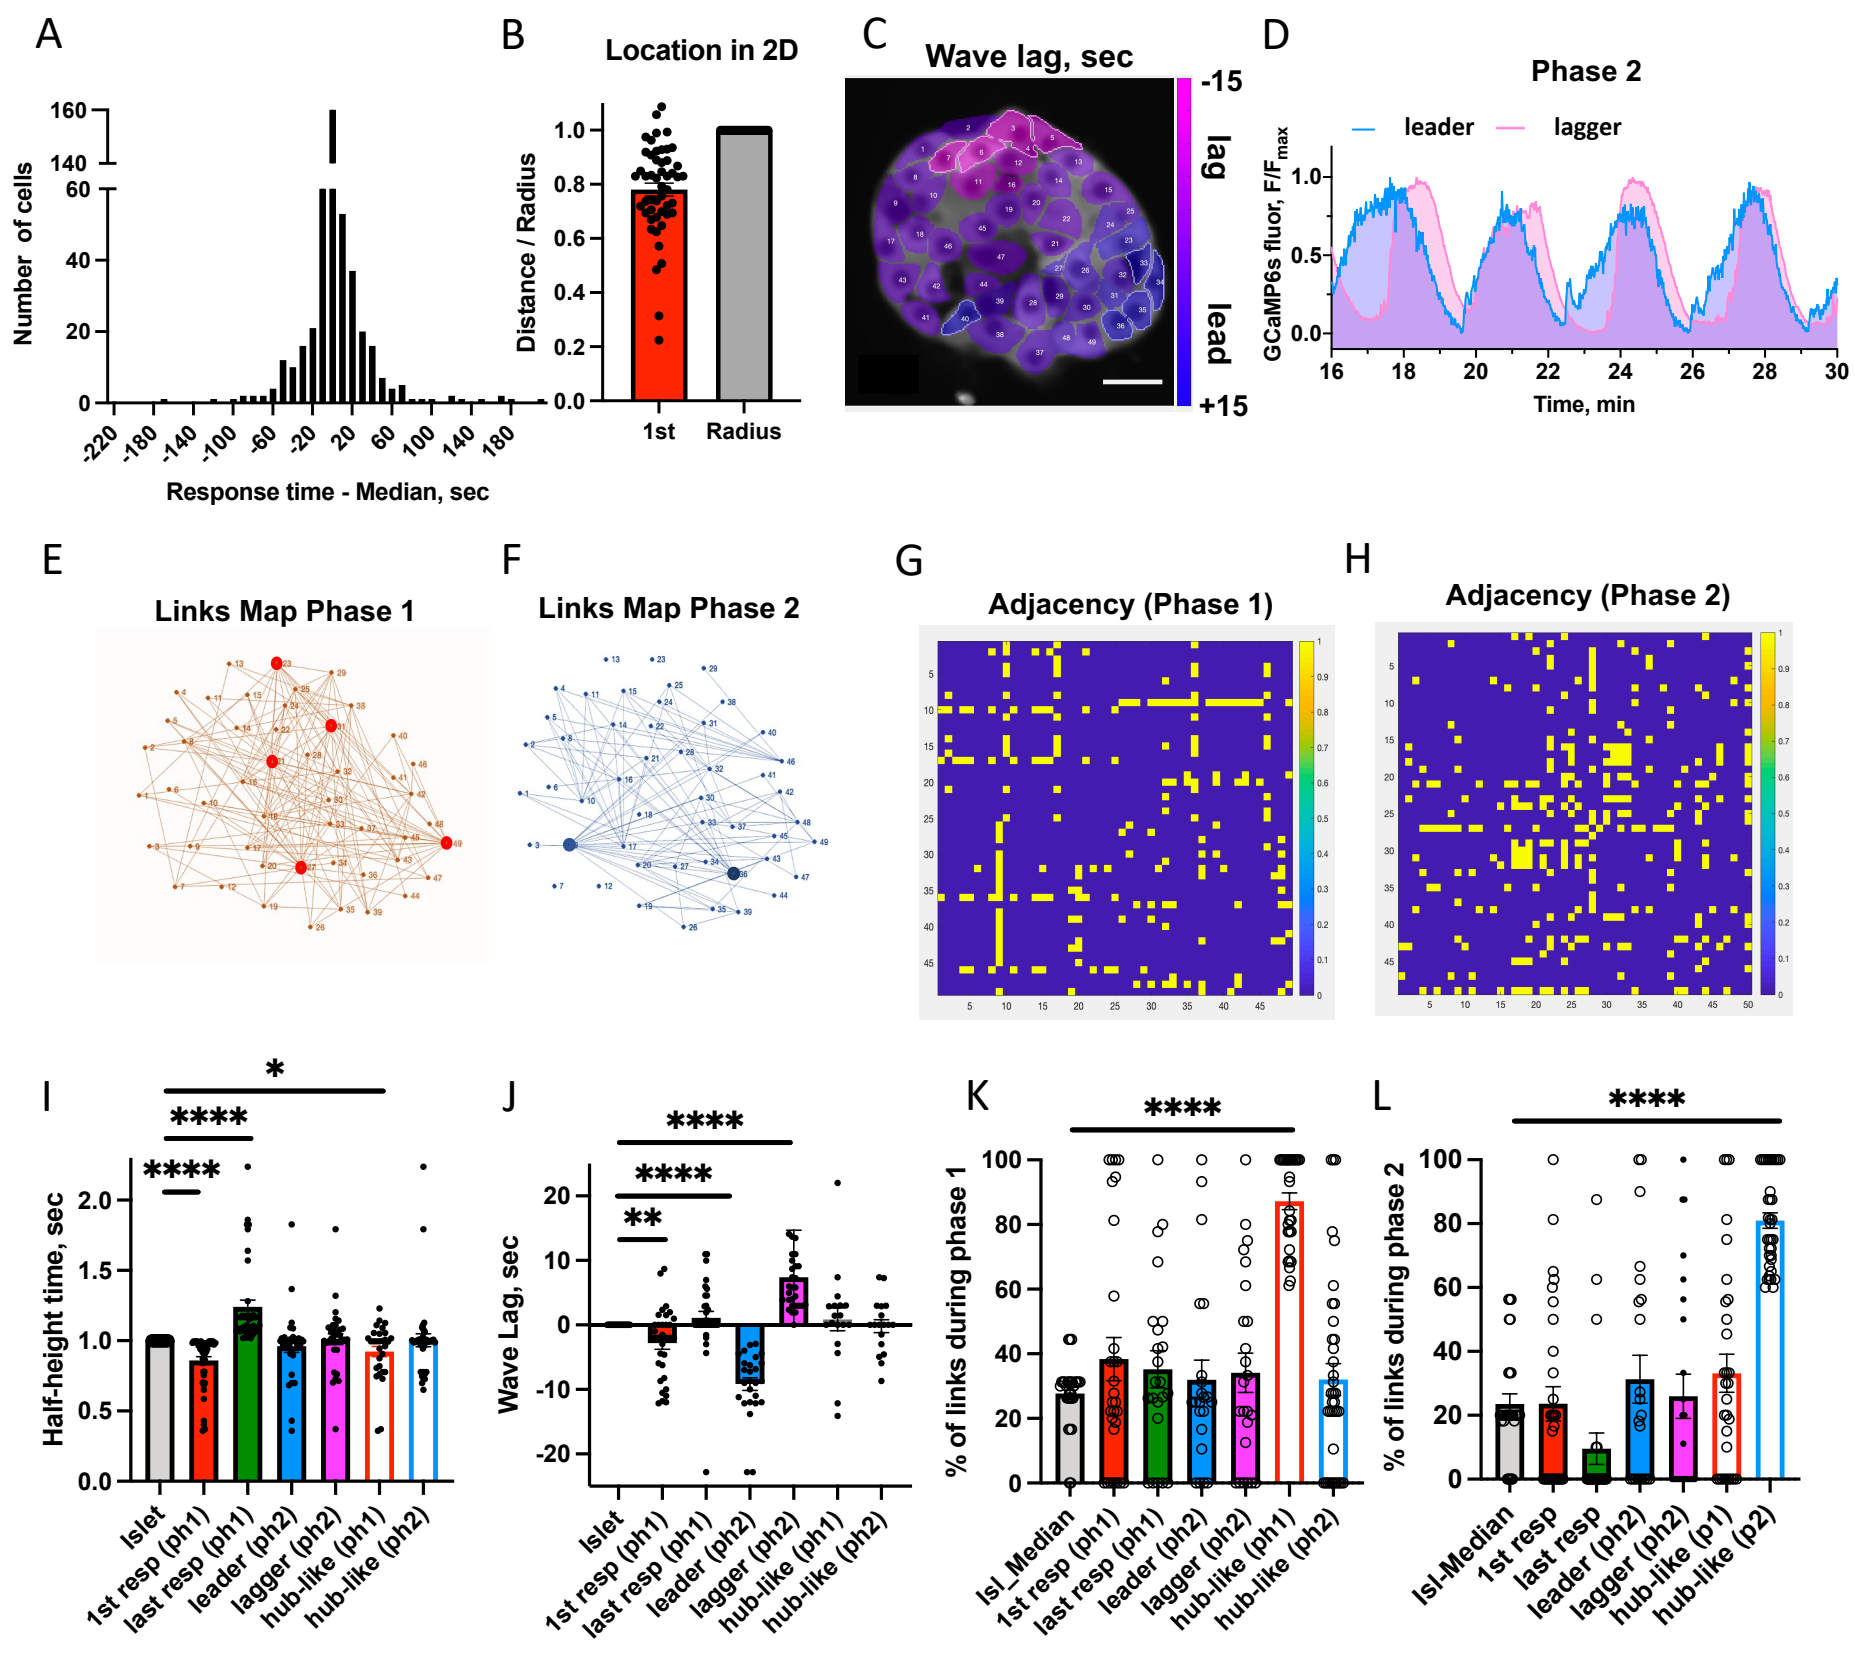

Figure S1
