# Supplementary material for: Functional architecture of pancreatic islets identifies a population of first responder cells that drive the first-phase calcium response
Source: PubMed Central journal article supplement (PMC9506623; doi:10.1371/journal.pbio.3001761), 2022-09-13

A

No ablation

Control cell ablation

First responder cell ablation

temporal consistency of initial 1<sup>st</sup> and last cells (% of islets)

temporal consistency of initial 1<sup>st</sup> and last cells (% of islets)

temporal consistency of initial 2<sup>nd</sup> and last cells (% of islets)

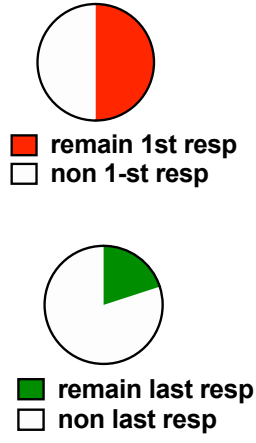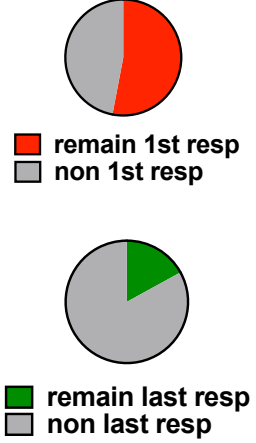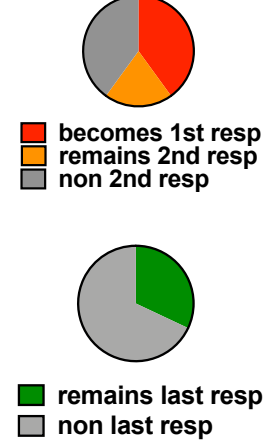

B

AUC, %, By Size

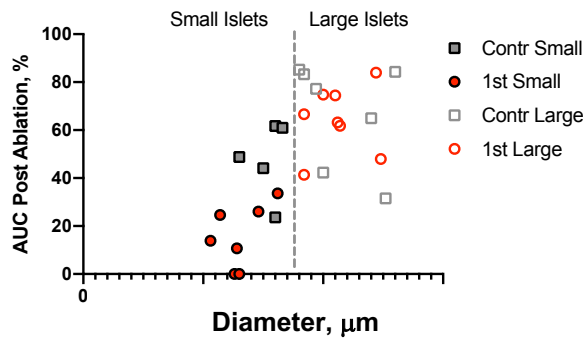

C

Islet size distribution

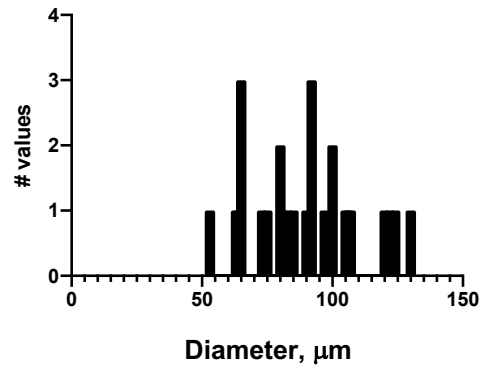

Supplement: pbio.3001761.s005.pdf [file pbio.3001761.s005.pdf]
