# Supplementary material for: Functional architecture of pancreatic islets identifies a population of first responder cells that drive the first-phase calcium response
Source: PubMed Central journal article supplement (PMC9506623; doi:10.1371/journal.pbio.3001761), 2022-09-13
Supplement: pbio.3001761.s007.pdf [file pbio.3001761.s007.pdf]

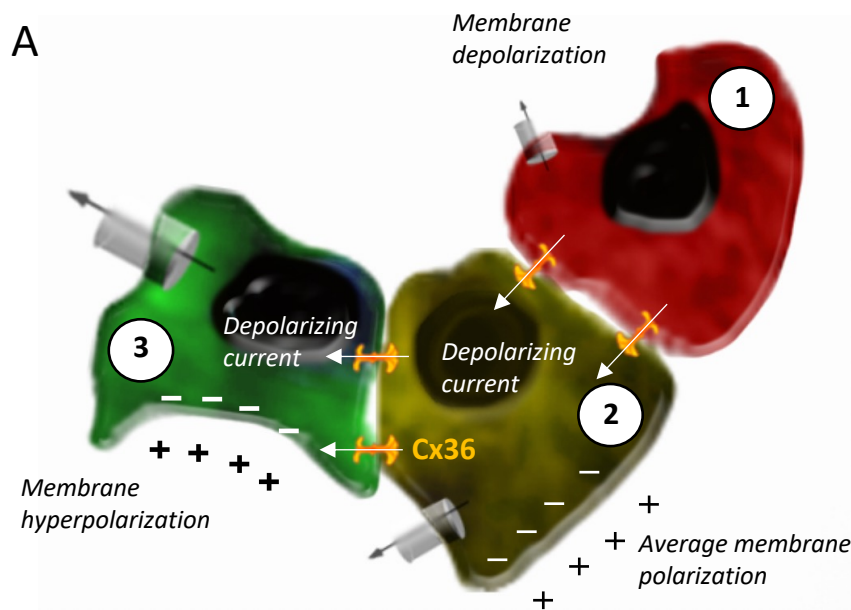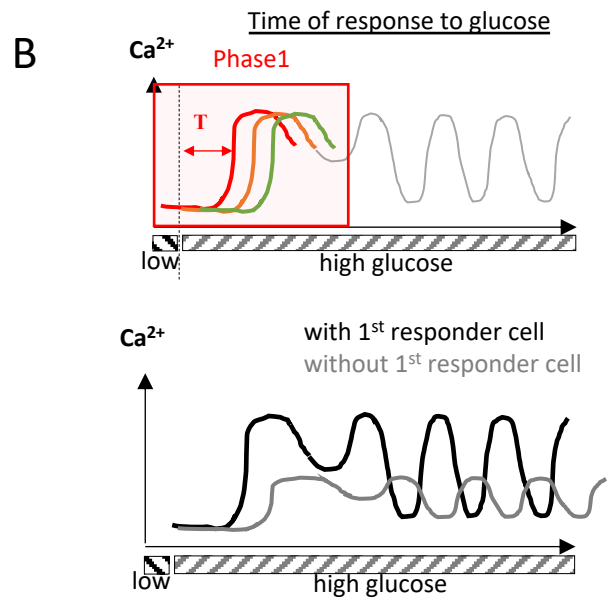

**C** Hierarchy of the response time w/ and w/o original 1<sup>st</sup> resp cell

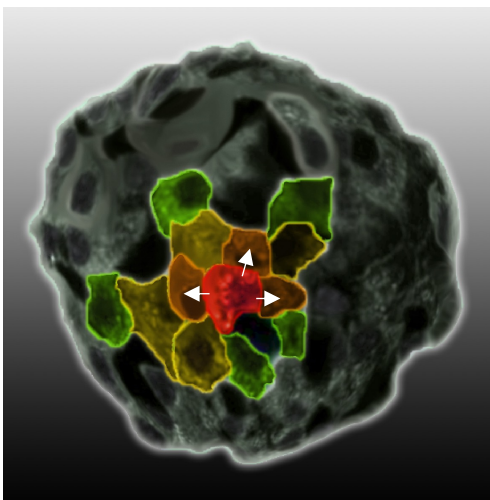

Before ablation of the 1<sup>st</sup> resp

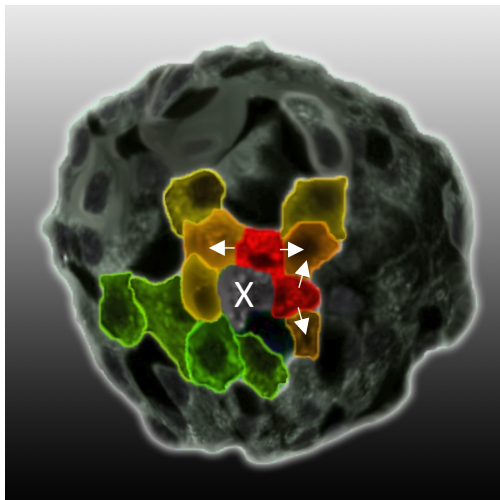

After - 2<sup>nd</sup> responder takes over

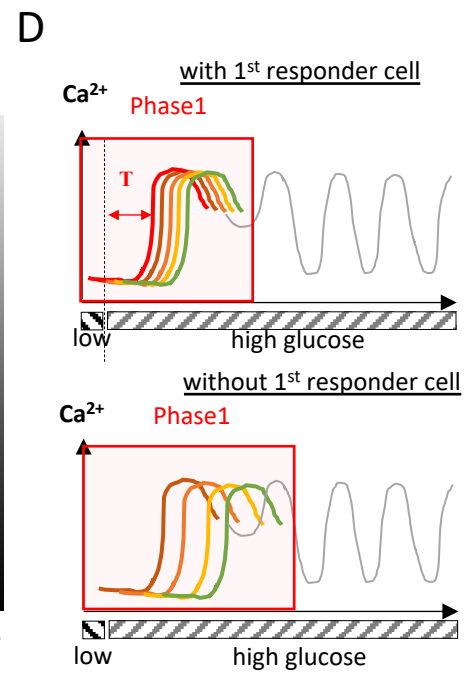

Figure S7
