# Supplementary material for: Functional architecture of pancreatic islets identifies a population of first responder cells that drive the first-phase calcium response
Source: PubMed Central journal article supplement (PMC9506623; doi:10.1371/journal.pbio.3001761), 2022-09-13
Supplement: pbio.3001761.s008.pdf [file pbio.3001761.s008.pdf]

| <b>Parameter</b>     | <b>Description of parameter</b>                                                                               | <b>Distribution</b> | <b>Mean <math>\pm</math> Std Dev</b> | <b>units</b>           |
|----------------------|---------------------------------------------------------------------------------------------------------------|---------------------|--------------------------------------|------------------------|
| $g_{KATP}$           | Max conductance of $K_{ATP}$ channel current                                                                  | Normal              | $2.31 \pm 0.57$                      | $\text{pA mV}^{-1}$    |
| $k_{glc}$            | Rate constant of glycolysis                                                                                   | Normal              | $0.000126 \pm 0.0000315$             | $\text{ms}^{-1}$       |
| $g_{Coup}$           | Coupling conductance                                                                                          | Gamma, $k=\theta=4$ | $120 \pm 30$                         | ps                     |
| $g_{KTO}$            | Conductance of $I_{KCa(BK)}$ (voltage and $\text{Ca}^{2+}$ ) dependent transient outward $\text{K}^+$ current | Normal              | $2.13 \pm 0.213$                     | $\text{pA mV}^{-1}$    |
| $P_{SERCA}$          | Maximum rate of pumping $\text{Ca}^{2+}$ into ER                                                              | Normal              | $0.096 \pm 0.0096$                   | amole $\text{ms}^{-1}$ |
| $P_{NaCa}$           | Maximum amplitude of $I_{NaCa}$ , $\text{Na}^+/\text{Ca}^{2+}$ exchanger                                      | Normal              | $204 \pm 20$                         | pA                     |
| $P_{rel}$            | Converting factor for $\text{Ca}^{2+}$ release from ER                                                        | Normal              | $0.46 \pm 0.46$                      | fl $\text{ms}^{-1}$    |
| $P_{op}$             | Maximum rate of ATP production from oxphos                                                                    | Normal              | $0.0005 \pm 0.00005$                 | $\text{ms}^{-1}$       |
| $[\text{ATP}_{tot}]$ | Total amount of ATP species                                                                                   | Normal              | $4 \pm 0.4$                          | mM                     |

Supplemental Table
